# Supplementary material for: Surface band bending caused by native oxides on solution-processed twinned InSb nanowires with p-type conductivity
Source: Royal Society of Chemistry journal article supplement (doi:10.1039/d3nr03924b), 2023-01-01
Supplement: d3nr03924b1.pdf [file d3nr03924b1.pdf]

## Surface band bending caused by native-oxides on solution-processed twinned InSb nanowires with p-type conductivity

Rui Xu,<sup>‡a</sup> Kaijia Xu,<sup>‡a</sup> Yingzhi Sun,<sup>a</sup> Yan Wen,<sup>a</sup> Lanjun Cheng,<sup>b</sup> Feng-cui Shen,<sup>\*a</sup> Yinyin Qian <sup>\*a</sup>

<sup>a</sup> Anhui Laboratory of Clean Energy Materials and Chemistry for Sustainable Conversion of Natural Resources, College of Chemical and Environmental Engineering, Anhui Polytechnic University, Wuhu, 241000, P.R. China

<sup>b</sup> School of Chemistry and Chemical Engineering, Hefei University of Technology, Hefei, 230009, P.R. China

**Table S1.** The parameters of XRD test.

| target | measurement | sample form | detector | geometry         | software       | expected resolution |
|--------|-------------|-------------|----------|------------------|----------------|---------------------|
| copper | Bragg       | powder      | 2D       | 10 $\mu\text{m}$ | highscore plus | $\pm 0.0001^\circ$  |

**Table S2.** The parameters of XPS test.

| XPS analyzer             | excitation source                     | photon energy | number of scans | software | expected resolution |
|--------------------------|---------------------------------------|---------------|-----------------|----------|---------------------|
| Perkin-Elmer ESCALAB 250 | monochromatic Al $K_\alpha$ radiation | 1486.68 eV    | 5               | Avantage | 0.1 eV              |

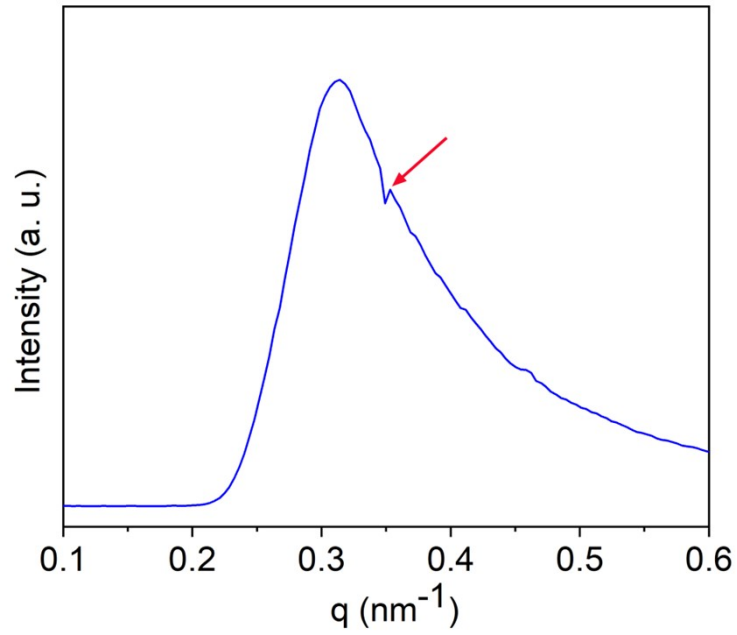

**Figure S1.** Small angle X-ray scattering (SAXS) detection of the as-obtained InSb NWs. The SAXS pattern detects that the pseudoperiodicity is of  $d = 177.85 \text{ \AA}$  (at  $q = 0.3531 \text{ nm}^{-1}$ ,  $d = 2\pi/q = 17.785 \text{ nm}$ ).

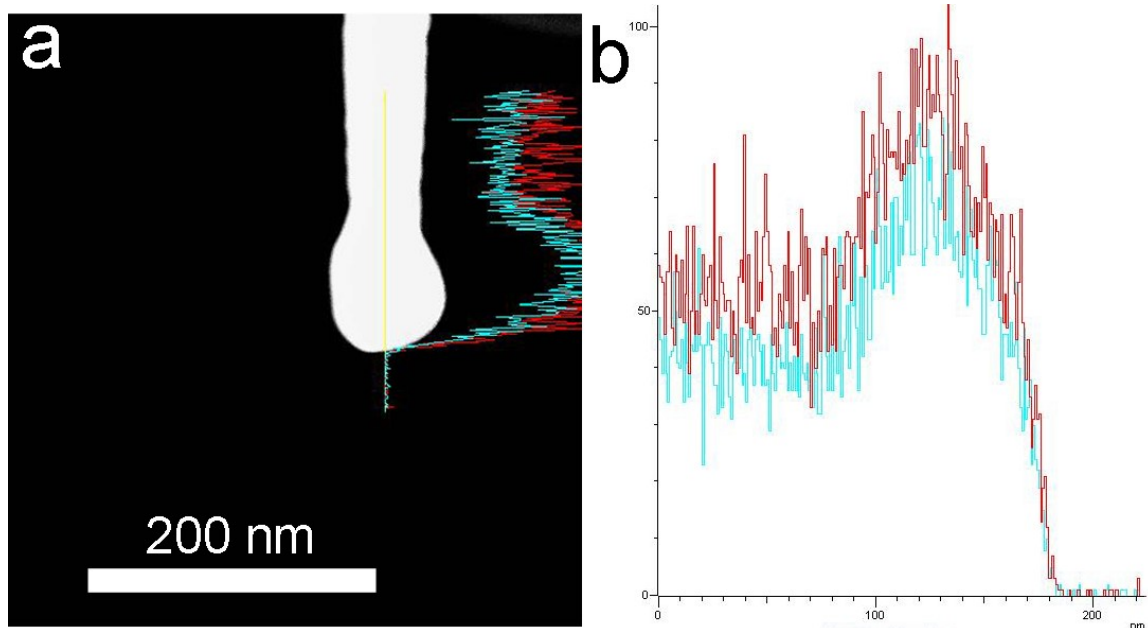

**Figure S2.** (a) STEM-EDX line scan of the single InSb nanowire, and (b) magnified line-scan profile, red and cyan lines represent In and Sb elements, respectively.

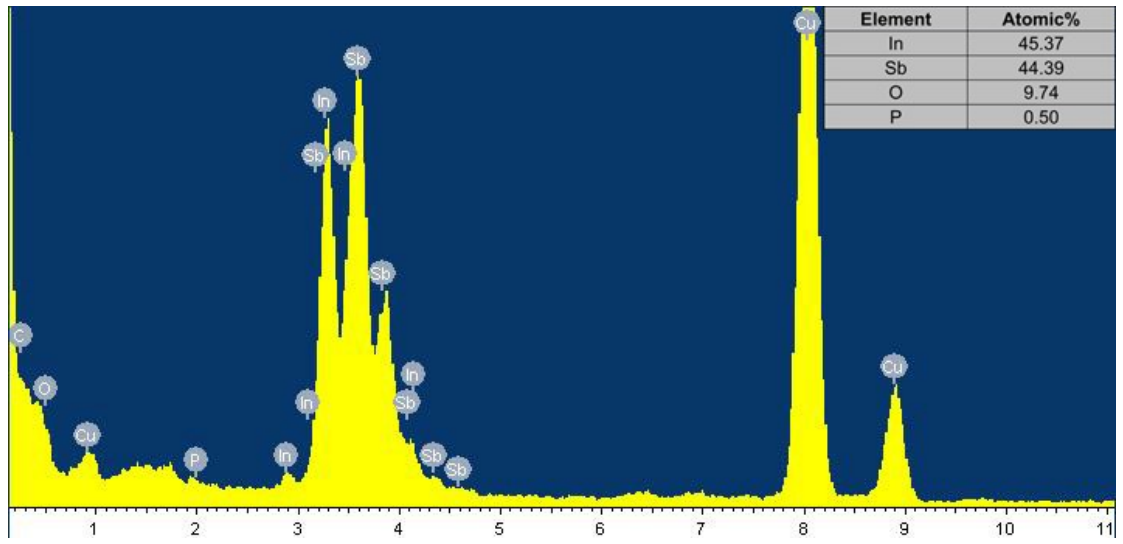

**Figure S3.** EDX spectra of InSb nanowire.

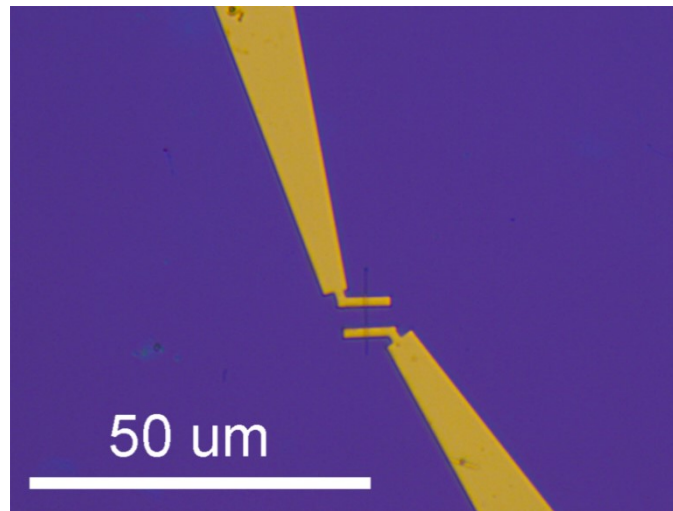

**Figure S4.** The microscope image of the as-fabricated single NW-based device.

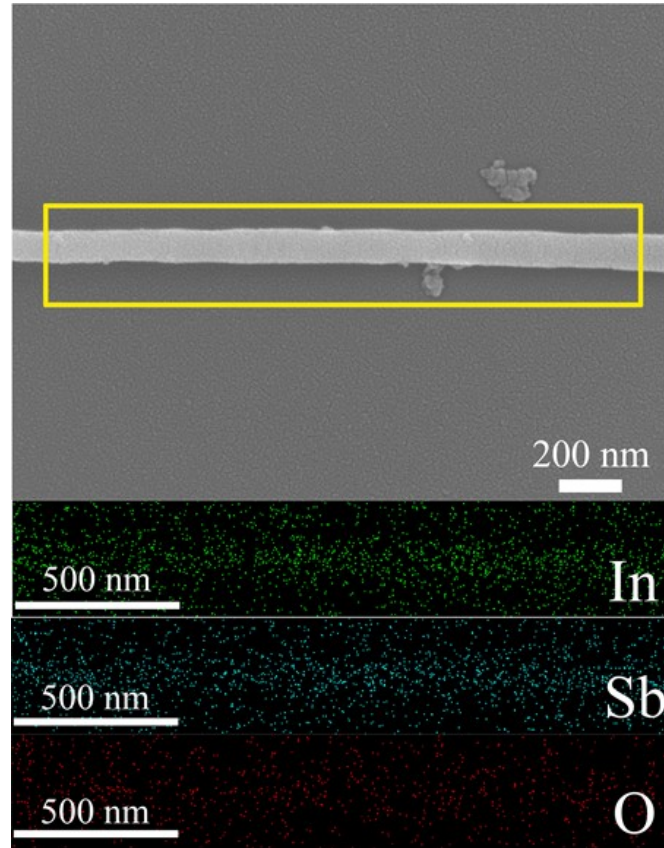

**Figure S5.** SEM image of NW after testing and corresponding elemental mapping. The area of elemental mappings is consistent with the yellow box in the STEM image.

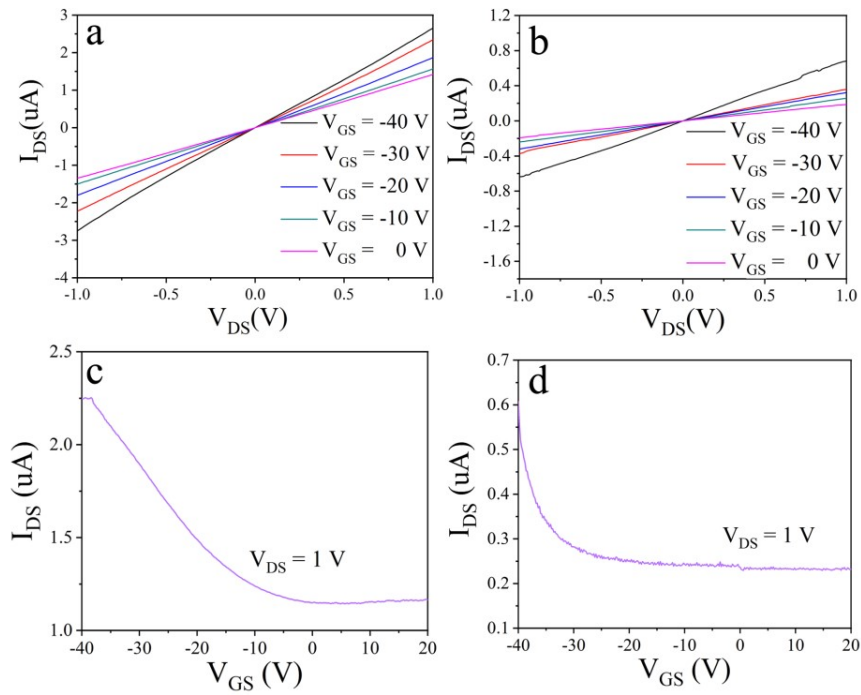

**Figure S6.** (a,b)  $I_{DS}$ - $V_{DS}$  curves at varied gate voltages after 5 and 20 days of air exposure, respectively. (c,d)  $I_{DS}$ - $V_{GS}$  curves at  $V_{DS} = 1$  V with p-type characteristic after 5 and 20 days of air exposure, respectively.

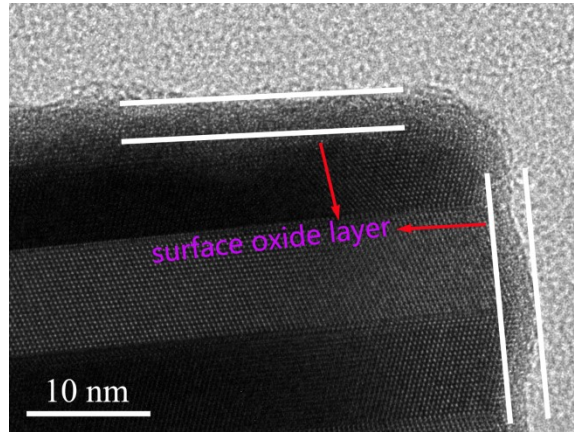

**Figure S7.** HRTEM image of an individual InSb nanowire after air exposure for 20 days.

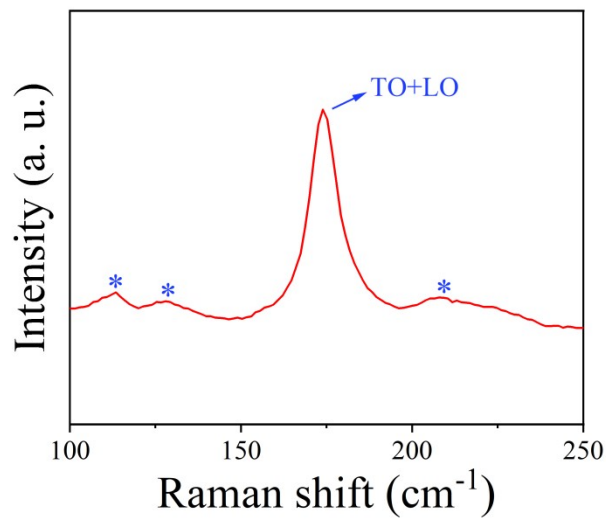

**Figure S8.** Raman spectroscopy of the InSb NWs detected at room temperature. The peak located at around  $174\text{ cm}^{-1}$  corresponds to the transverse-optical (TO) and longitudinal-optical (LO) phonon mode of InSb NWs.<sup>1,2</sup> The peaks emerging at about  $114$ ,  $130$ , and  $212\text{ cm}^{-1}$  (labeled with \*) were ascribed to surface oxide layers composed of the oxidation states of In and Sb.<sup>3,4</sup>

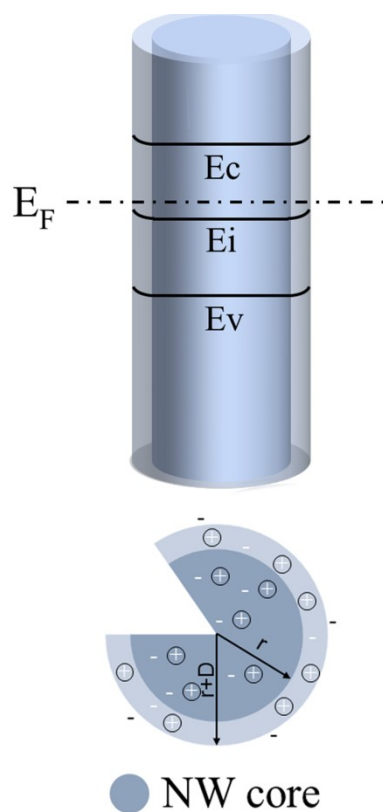

**Figure S9.** Schematic illustration of single NW with extremely thin oxide layer. The InSb NW contains a NW core and a native-oxides layer.  $E_b$ ,  $E_C$ ,  $E_V$ , and  $E_F$  represent the intrinsic Fermi energy level, conduction band minimum, valence band maximum and actual Fermi energy level, respectively.  $D$  and  $r$  represent the thickness of native-oxides layer and the diameter of NW core.

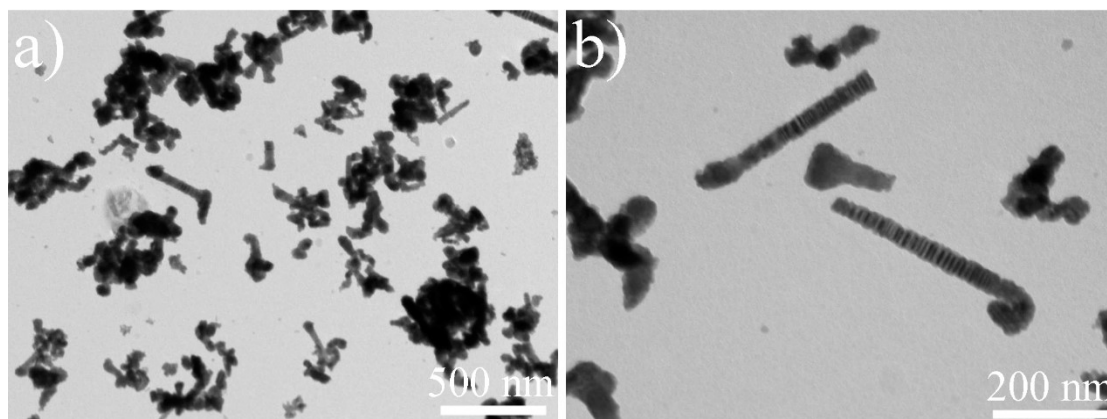

**Figure S10.** Low (a) and magnified (b) TEM images of HF-treated sample.

### Supplementary references.

- (1) Y. Y. Qian and Q. Yang, *Nano Lett.*, 2017, **17**, 7183–7190.
- (2) H. Potts, M. Friedl, F. Amaduzzi, K. C. Tang, G. Tutuncuoglu, F. Matteini, E. Alarcon Llado, P. C. McIntyre and A. F. I. Morral, *Nano Lett.*, 2016, **16**, 637–643.
- (3) W. H. Wang, X. S. Wang, Z. G. Ma, Y. Wang, Z. X. Yang, J. X. Zhu, L. Lv, H. Ning, N. Tsubaki and M. B. Wu, *Acs Catal.*, 2023, **13**, 796–802.
- (4) Y. Li, S. Chu, H. Shen, Q. Xia, A. W. Robertson, J. Masa, U. Siddiqui and Z. Sun, *ACS Sustainable Chem. Eng.*, 2020, **8**, 4948–4954.
